# Supplementary material for: Long-Lasting Effects of GSPE on Ileal GLP-1R Gene Expression Are Associated with a Hypomethylation of the GLP-1R Promoter in Female Wistar Rats
Source: Biomolecules. 2019 Dec 12;9(12):865. doi: 10.3390/biom9120865 (PMC6995503; doi:10.3390/biom9120865)
Supplement: Supplementary file 1 [file biomolecules-09-00865-s001.pdf]

Supplementary materials

Materials and Methods

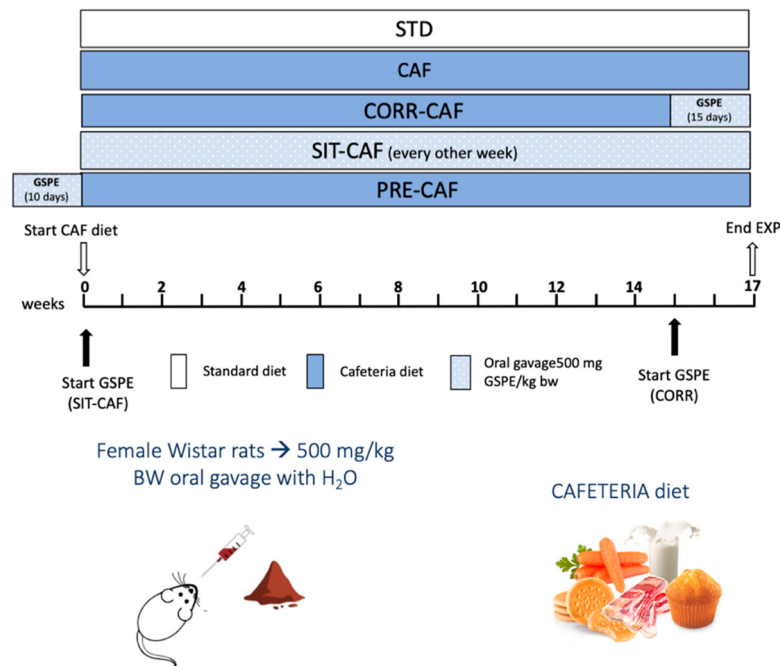

**Figure 1.** Schematic diagram of the experimental design. STD: standard chow diet; CAF: cafeteria diet; PRE-CAF: rats receiving GSPE (Grape-seed proanthocyanidins) preventive treatment 10 days before the cafeteria intervention started; SIT-CAF: rats receiving GSPE treatment simultaneously and intermittently with the cafeteria diet every other week; CORR-CAF: rats receiving GSPE corrective treatment during the last 15 days of the cafeteria intervention. GSPE: grape seed proanthocyanidin extract.

SCFA quantification

The concentration of SCFA (formic, acetic, propionic, butyric, isovaleric, valeric, lactic and succinic) were assayed in cecal content thawed at 4 °C. Briefly, 1 g of sample was added to a screw cap glass tube containing 1 mL ultrapure deionized water (1:1, w/w), and was vortexed vigorously. One hundred microliters of the internal standard 4-methyl-valeric acid, 2 mL of ethyl ether, and 0.5 mL of HCl 37% were added to these samples, and in parallel to 1 mL, a reference solution containing different concentrations of the standard SCFA was added. The tube was vortex mixed for 1 min and centrifuged for 15 min at 3500  $\times$  g. Sixty-five microliters of supernatant was used for the derivatization step, performed with 10  $\mu$ L of MTBSTFA ((N-methyl-N (tert-butyldimethylsilyl)-trifluoroacetamide), Aldrich 375934) at 80 °C for 30 min. Derivatized SCFAs were analyzed using gas chromatography (Agilent 6890-NT, Santa Clara, USA,) coupled with a 30 m  $\times$  0.25 mm id, column, with a film thickness of 0.25 micras (Agilent DB-23, Barcelona, Spain) and a flame ionization detector (FID) to determine SCFA concentrations [1]. The carrier gas used was helium. A constant flow mode was used (split 25:1; 30 mL min<sup>-1</sup> split flow). The column temperature was programmed to gradually increase from 60 to 220 °C during the analysis. In addition, injector port and FID temperatures were fixed at 250 °C. Injection volume was set to 1  $\mu$ L, and analyses were performed in duplicate [2].

**Table S1.** Cecal short chain fatty acids.

| $\mu$ mol/g | Acetic | Butiric | Formic | Isobutiric | Propionic | Succinic | Valeric |
|-------------|--------|---------|--------|------------|-----------|----------|---------|
|-------------|--------|---------|--------|------------|-----------|----------|---------|

|      |                  |                  |                 |                |                  |                |              |
|------|------------------|------------------|-----------------|----------------|------------------|----------------|--------------|
| STD  | 117.69 ± 8.2     | 70.61 ± 5.5<br>* | 19.06 ± 1.4     | 0 ± 0 #        | 17.07 ± 2.7<br># | 7.01 ± 0.9     | 2.48 ± 0.2   |
| CAF  | 93.72 ± 17.6     | 19.07 ± 3.6      | 16.29 ± 1.4     | 1.58 ± 1.0     | 37.57 ± 9.8      | 6.09 ± 1.3     | 2.02 ± 0.5   |
| SIT  | 83.73 ± 8.9      | 12.21 ± 3.0      | 16.43 ± 1.2     | 0.20 ± 0.1     | 31.65 ± 5.2      | 5.27 ± 1.8     | 1.04 ± 0.5   |
| PRE  | 85.75 ±<br>13.06 | 21.00 ±<br>6.01  | 15.75 ±<br>1.81 | 0.24 ±<br>0.24 | 30.20 ±<br>7.95  | 6.34 ±<br>1.10 | 314 ± 0.51   |
| CORR | 82.82 ± 21.1     | 10.50 ± 1.4<br>* | 14.71 ± 2.7     | 12.15 ±<br>8.4 | 64.17 ±<br>18.8  | 3.21 ±<br>0.12 | 0.74 ± 0.5 # |

Values represent mean ± SEM of 6–10 animals per group. \* $p \leq 0.05$  versus CAF; #  $p \leq 0.1$  versus CAF. Lactic acid was also measured but not found.

1. Rebolé, A.; Ortiz, L.T.; Rodríguez, M.L.; Alzueta, C.; Treviño, J.; Velasco, S. Effects of inulin and enzyme complex, individually or in combination, on growth performance, intestinal microflora, cecal fermentation characteristics, and jejunal histomorphology in broiler chickens fed a wheat- and barley-based diet. *Poult. Sci.* **2010**, *89*, 276–286.
2. Calik, A.; Ergün, A. Effect of lactulose supplementation on growth performance, intestinal histomorphology, cecal microbial population, and short-chain fatty acid composition of broiler chickens. *Poult. Sci.* **2015**, *94*, 2173–82.
